# Supplementary material for: Facile assembly of Fe3O4@Au nanocomposite particles for dual mode magnetic resonance and computed tomography imaging applications
Source: Royal Society of Chemistry journal article supplement (doi:10.1039/c2jm16851k), 2012-01-01
Supplement: c2jm16851k.pdf [file c2jm16851k.pdf]

## Electronic Supplementary Information

# Facile assembly of Fe<sub>3</sub>O<sub>4</sub>@Au nanocomposite particles for dual mode magnetic resonance and computed tomography imaging applications

Hongdong Cai,<sup>a1</sup> Kangan Li,<sup>b1</sup> Mingwu Shen,<sup>\*c</sup> Shihui Wen,<sup>c</sup> Yu Luo,<sup>c</sup> Chen Peng,<sup>a</sup> Guixiang Zhang,<sup>\*b</sup> Xiangyang Shi<sup>\*acd</sup>

<sup>a</sup> State Key Laboratory for Modification of Chemical Fibers and Polymer Materials, Donghua University, Shanghai 201620, People's Republic of China

<sup>b</sup> Department of Radiology, Shanghai Jiaotong University Affiliated First People's Hospital, Shanghai Jiaotong University School of Medicine, 100 Haining Road, Shanghai 200080, People's Republic of China

<sup>c</sup> College of Chemistry, Chemical Engineering and Biotechnology, Donghua University, Shanghai 201620, People's Republic of China

<sup>d</sup> CQM-Centro de Química da Madeira, Universidade da Madeira, Campus da Penteada, 9000-390 Funchal, Portugal

---

\* To whom correspondence should be addressed. E-mail: mwshen@dhu.edu.cn (M. Shen), guixiangzhang@sina.com (G. Zhang), and xshi@dhu.edu.cn (X. Shi).

<sup>1</sup>These authors contributed equally to this work.

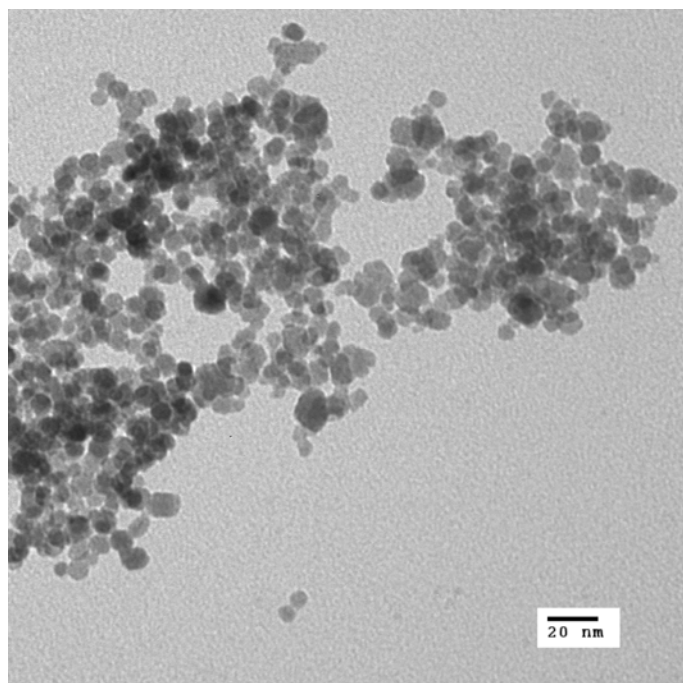

**Figure S1.** TEM image of the synthesized Fe<sub>3</sub>O<sub>4</sub> NPs.

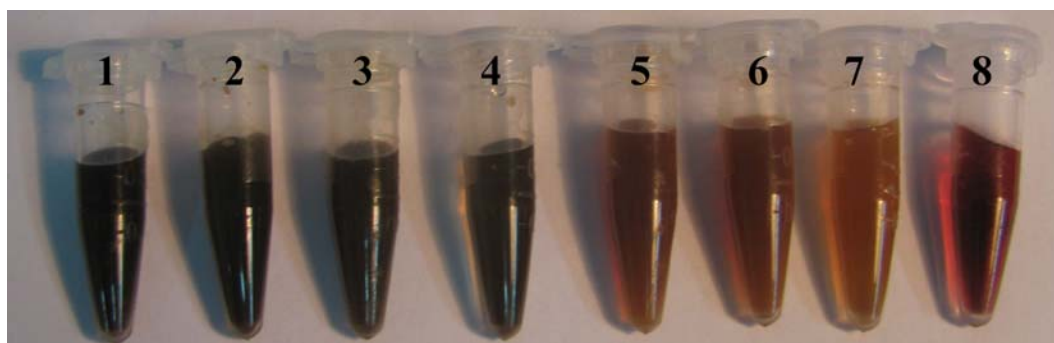

**Figure S2.** Photographs of particle dispersion of Fe<sub>3</sub>O<sub>4</sub> (1), Fe<sub>3</sub>O<sub>4</sub>/PGA (2), Fe<sub>3</sub>O<sub>4</sub>/PGA/PLL (3), Fe<sub>3</sub>O<sub>4</sub>/PGA/PLL/PGA (4), Fe<sub>3</sub>O<sub>4</sub>/PGA/PLL/PGA/Au DENPs (5), Fe<sub>3</sub>O<sub>4</sub>/PGA/PLL/PGA/Au DENPs after EDC crosslinking (6), Fe<sub>3</sub>O<sub>4</sub>@Au NPs after acetylation (7), and {(Au<sup>0</sup>)<sub>50</sub>-G5.NH<sub>2</sub>} DENPs (8), respectively.

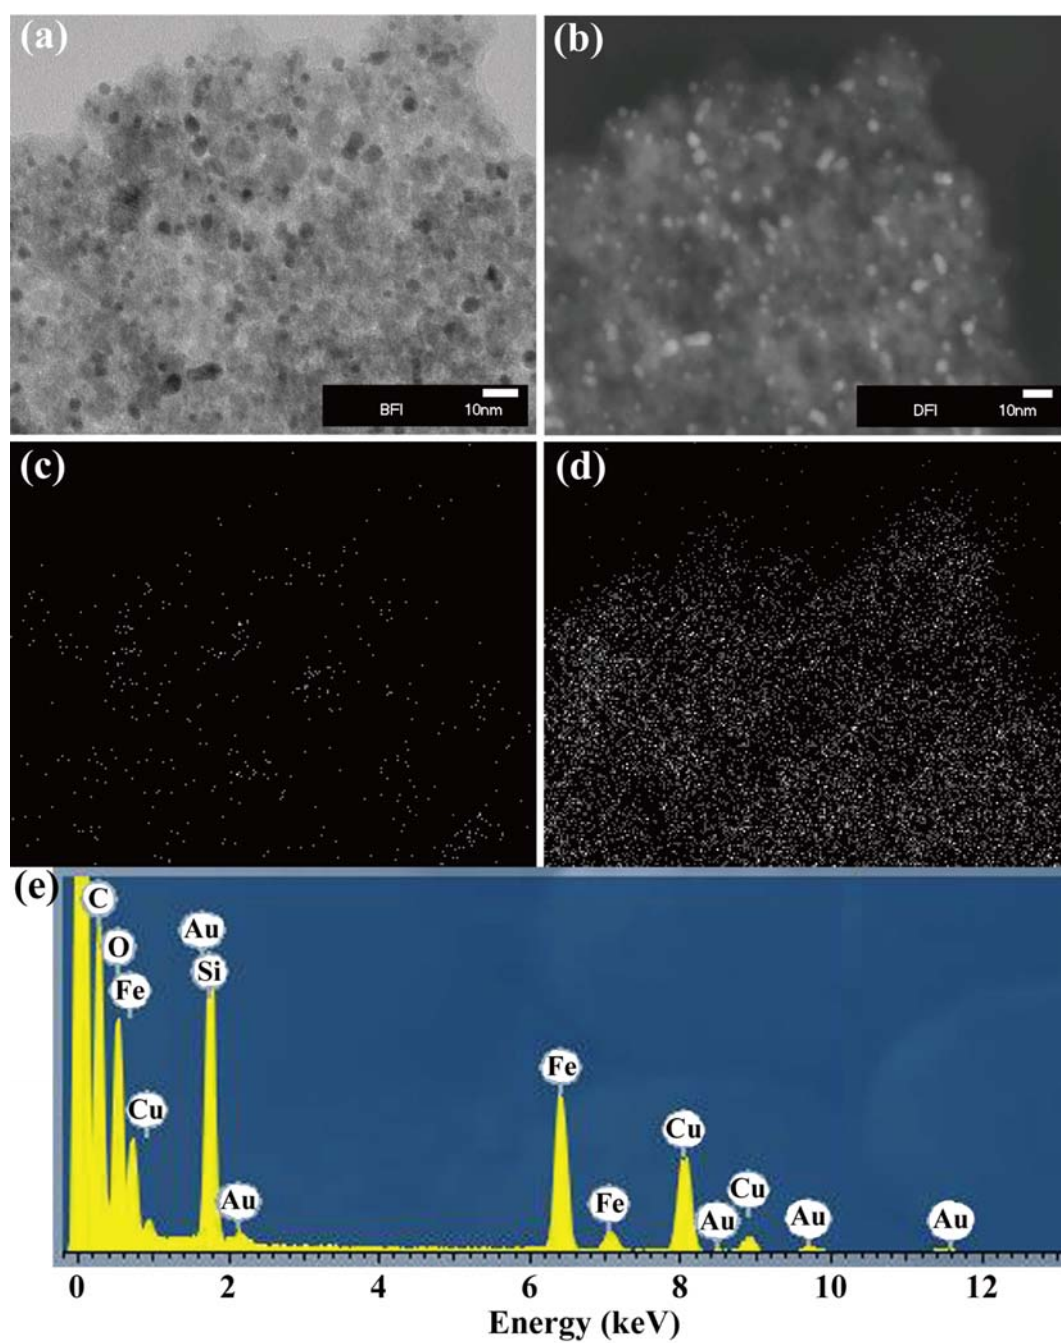

**Figure S3.** TEM images of  $\text{Fe}_3\text{O}_4@Au$  NCPs in bright field (a) and dark field (b), and EDS mapping of Au (c) and Fe (d) in  $\text{Fe}_3\text{O}_4@Au$  NPs. (e) shows the EDS spectrum of the formed  $\text{Fe}_3\text{O}_4@Au$  NCPs.

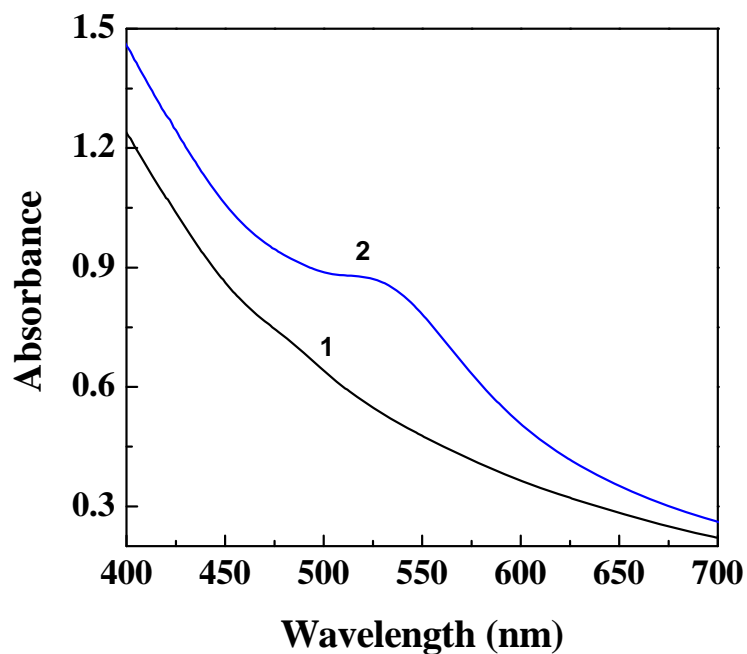

**Figure S4.** UV-vis spectra of the aqueous solution of  $\text{Fe}_3\text{O}_4$  NPs assembled with PGA/PLL/PGA trilayers (1) and the formed  $\text{Fe}_3\text{O}_4@Au$  NCPs (2).

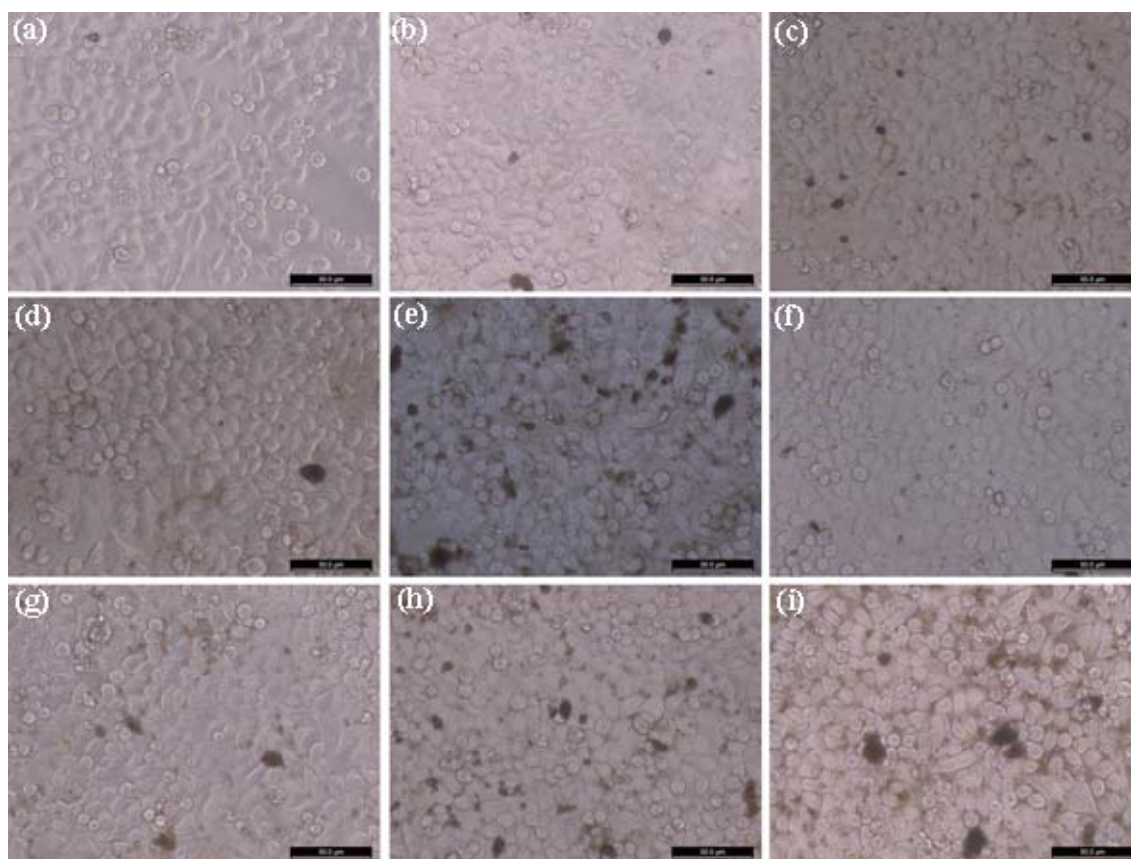

**Figure S5.** The phase contrast microscopic images of KB cells treated with PBS buffer (a),  $\text{Fe}_3\text{O}_4@Au$  NCPs (with a concentration of 10 (b), 25 (c), 50 (d), and 100 (e)  $\mu\text{g/mL}$ , respectively), and  $\text{Fe}_3\text{O}_4@G5$  NPs (with a concentration of 10 (f), 25 (g), 50 (h), 100 (i)  $\mu\text{g/mL}$ , respectively) for

24 h.

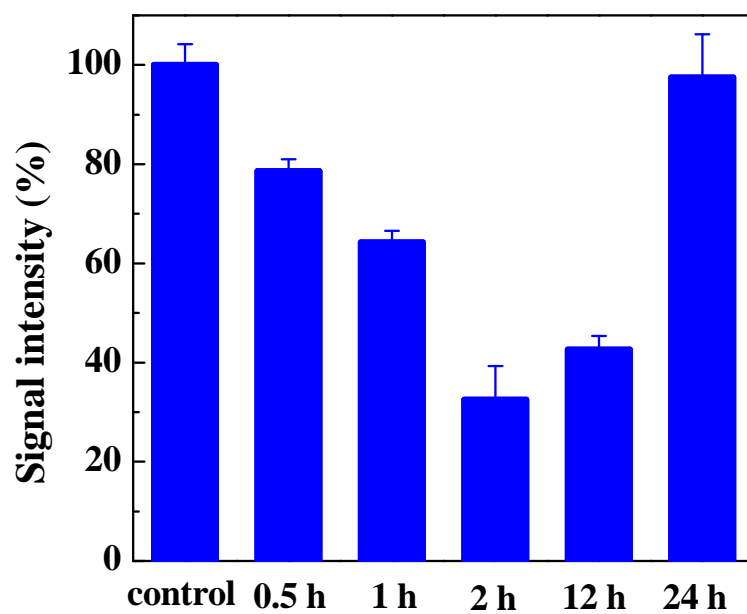

**Figure S6.** The change of the percentage of signal intensity of the mouse liver as a function of time post injection of the Fe<sub>3</sub>O<sub>4</sub>@Au NCPs.
